# Supplementary material
Source: PubMed Central journal article supplement (PMC3175023)

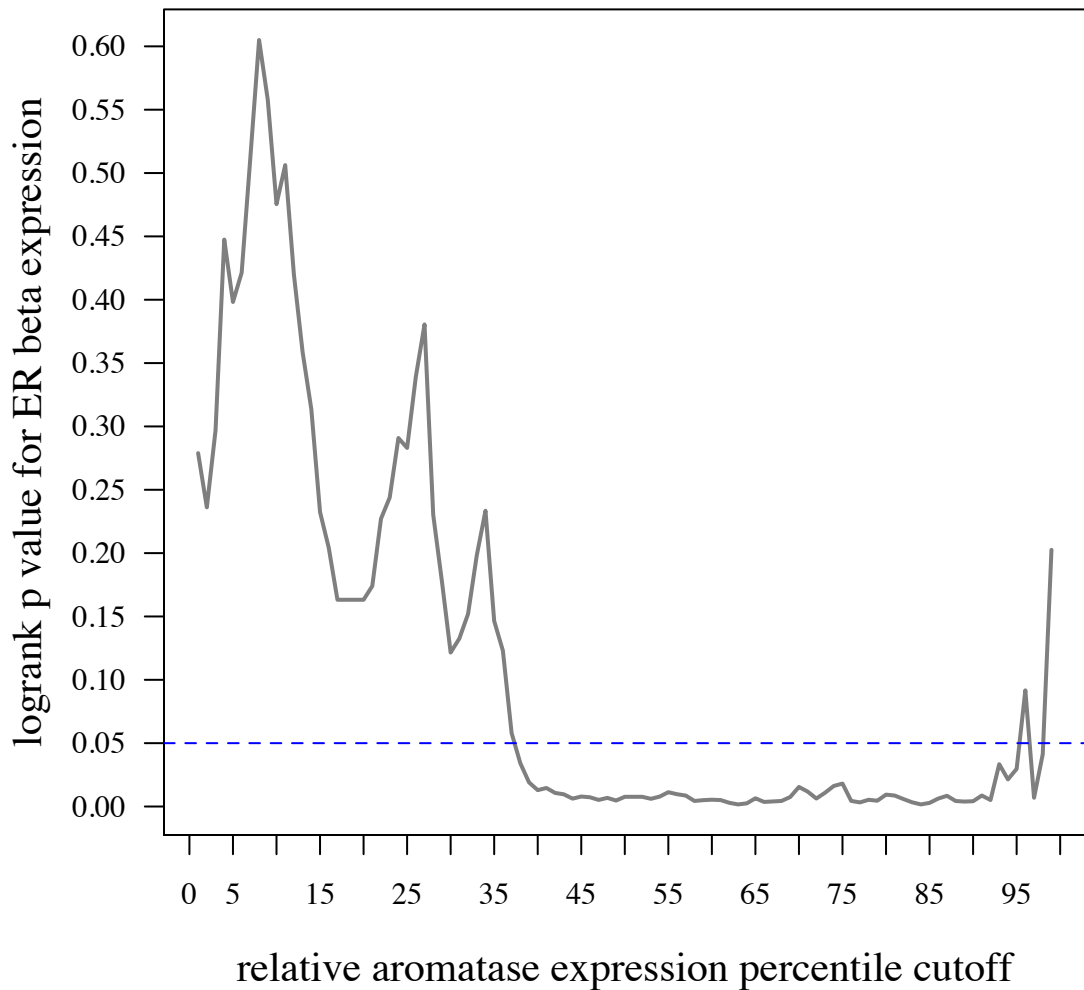

Supplement: NIHMS291409-supplement-06.pdf [file NIHMS291409-supplement-06.pdf]

# all patients, optimized cutpoints

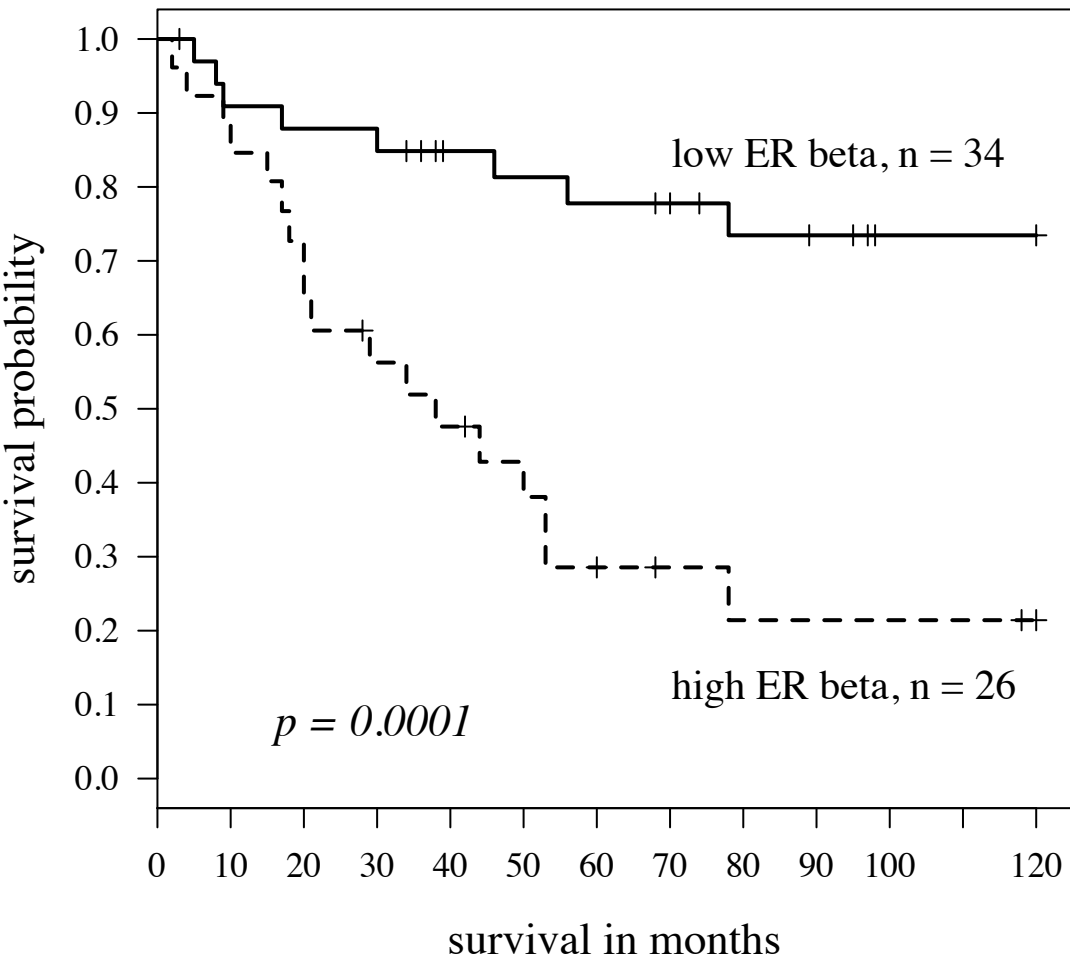

Supplement: NIHMS291409-supplement-07.pdf [file NIHMS291409-supplement-07.pdf]

## women 65 & over, optimized cutpoints

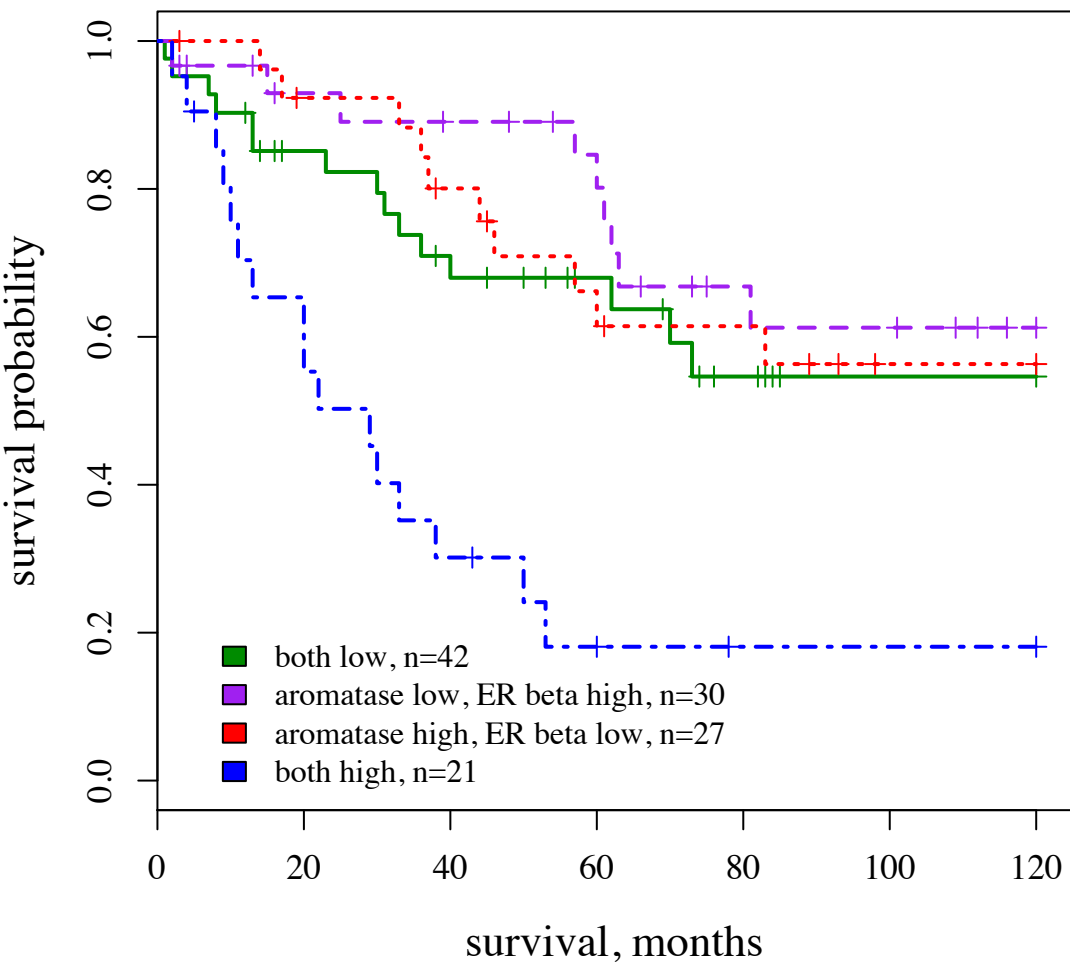

Supplement: NIHMS291409-supplement-08.pdf [file NIHMS291409-supplement-08.pdf]

## women 65 & over, optimized cutpoints

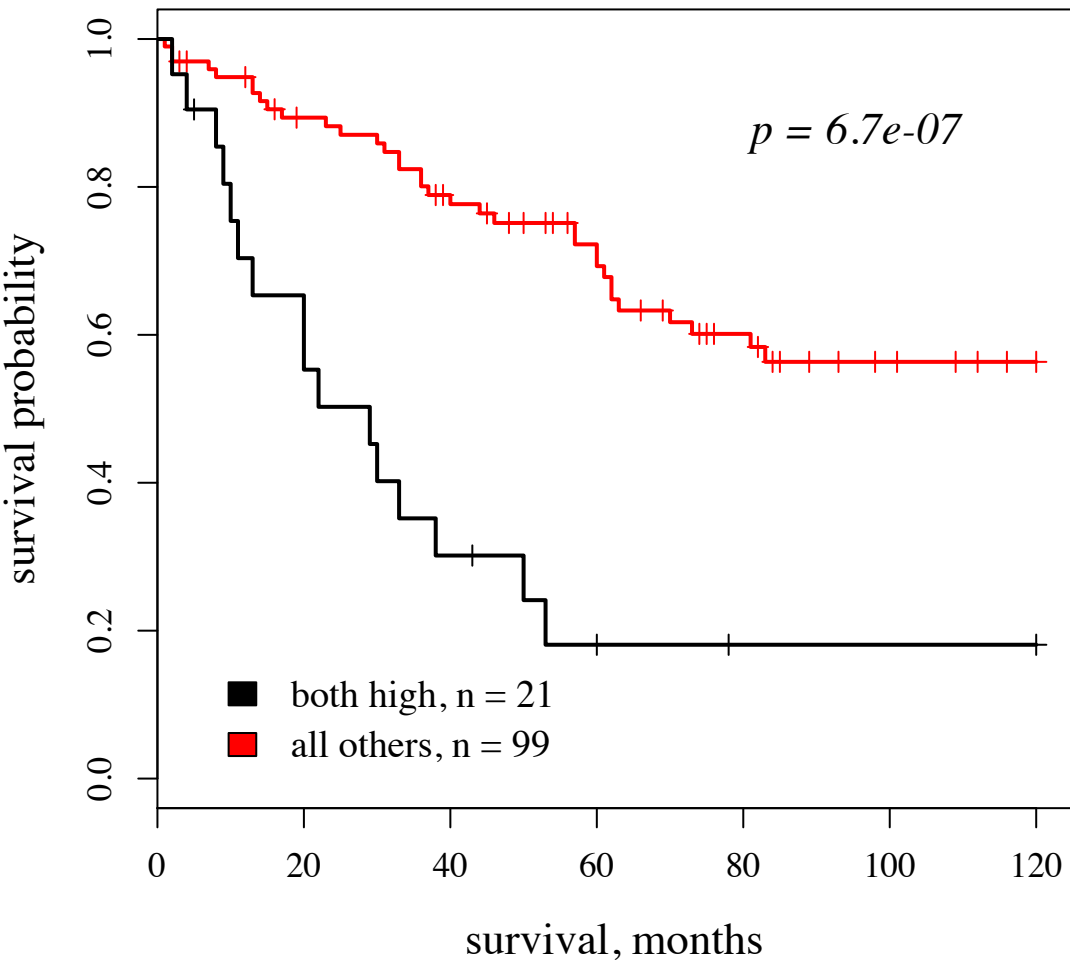

Supplement: NIHMS291409-supplement-09.pdf [file NIHMS291409-supplement-09.pdf]
